# Supplementary material
Source: PubMed Central journal article supplement (PMC2034216)

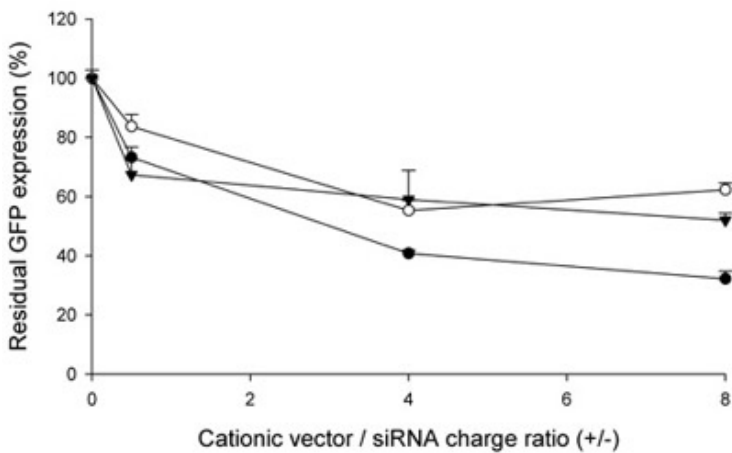

Supplement: pnas_0707431104_1.pdf [file pnas_0707431104_1.pdf]

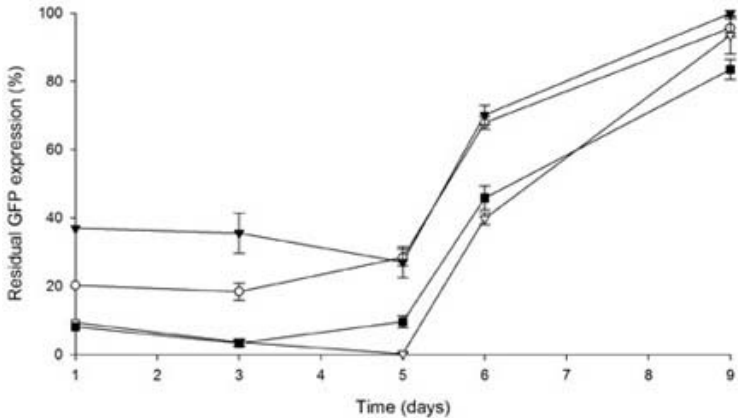

Supplement: pnas_0707431104_2.pdf [file pnas_0707431104_2.pdf]

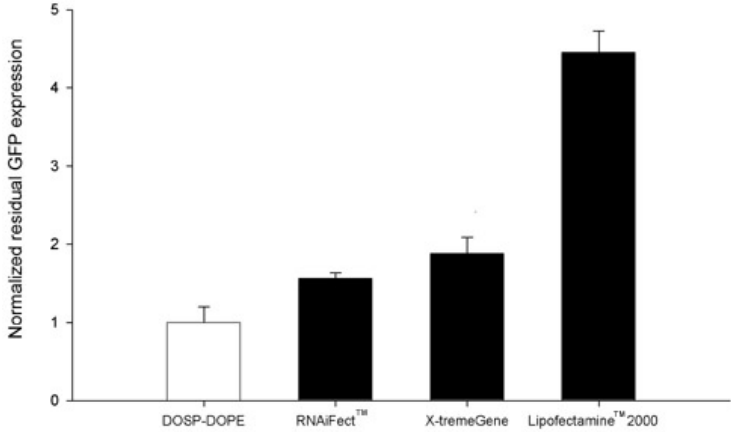

Supplement: pnas_0707431104_3.pdf [file pnas_0707431104_3.pdf]
